# Supplementary material
Source: PubMed Central journal article supplement (PMC1305123)
Supplement: biophysj_104.051771_1.pdf [file biophysj_104.051771_1.pdf]

## Supplemental Materials for:

# Effects of Monofunctional Adducts of Platinum(II) Complexes on Thermodynamic Stability and Energetics of DNA Duplexes

Vendula Bursova, Jana Kasparkova, Ctirad Hofr and Viktor Brabec

Institute of Biophysics, Academy of Sciences of the Czech Republic, Kralovopolska 135, CZ-61265 Brno, Czech Republic

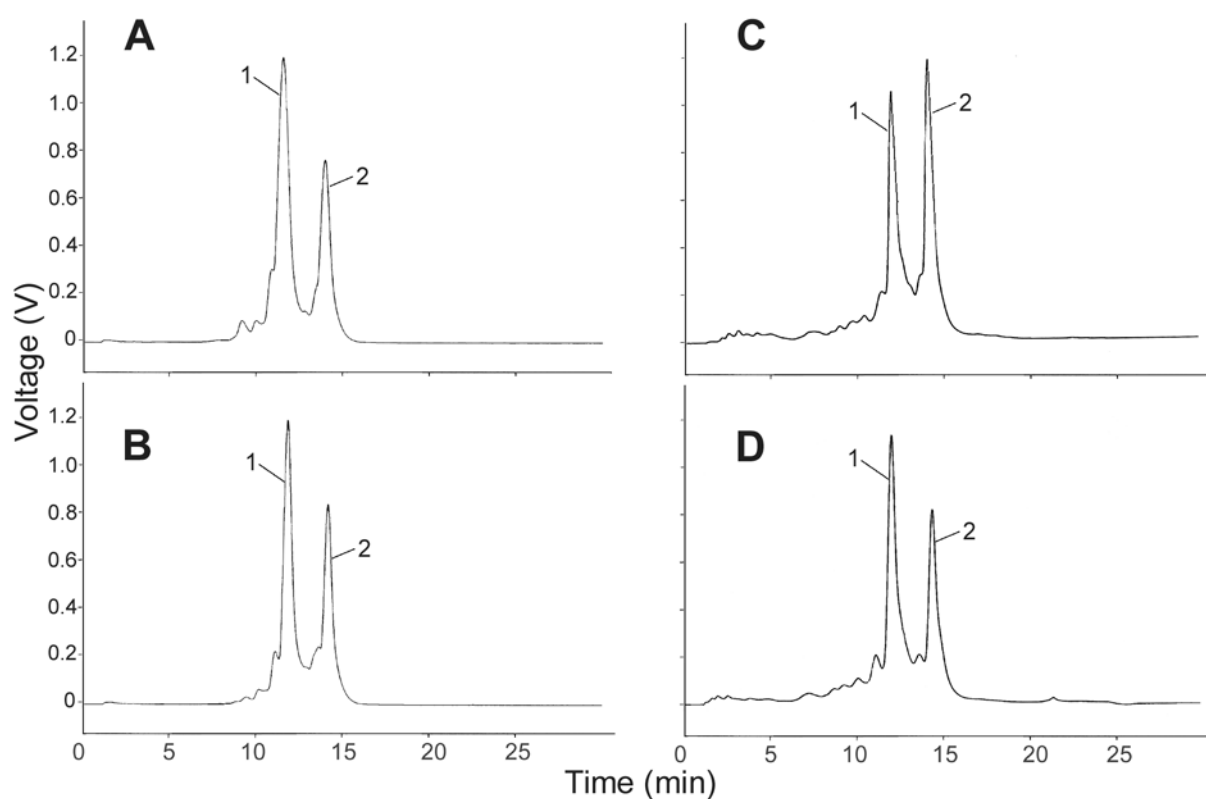

**FIGURE S1** The elution patterns of the ion-exchange FPLC analysis of the top strands of the TGT (A,B) and AGT (C,D) duplexes. The oligonucleotides were modified by  $[\text{PtCl}(\text{dien})]\text{Cl}$  (A,C) or  $[\text{PtCl}(\text{NH}_3)_3]\text{Cl}$  (B,D). The peaks marked 1 and 2 are related to the platinated or unmodified products, respectively. For other details, see the main text.

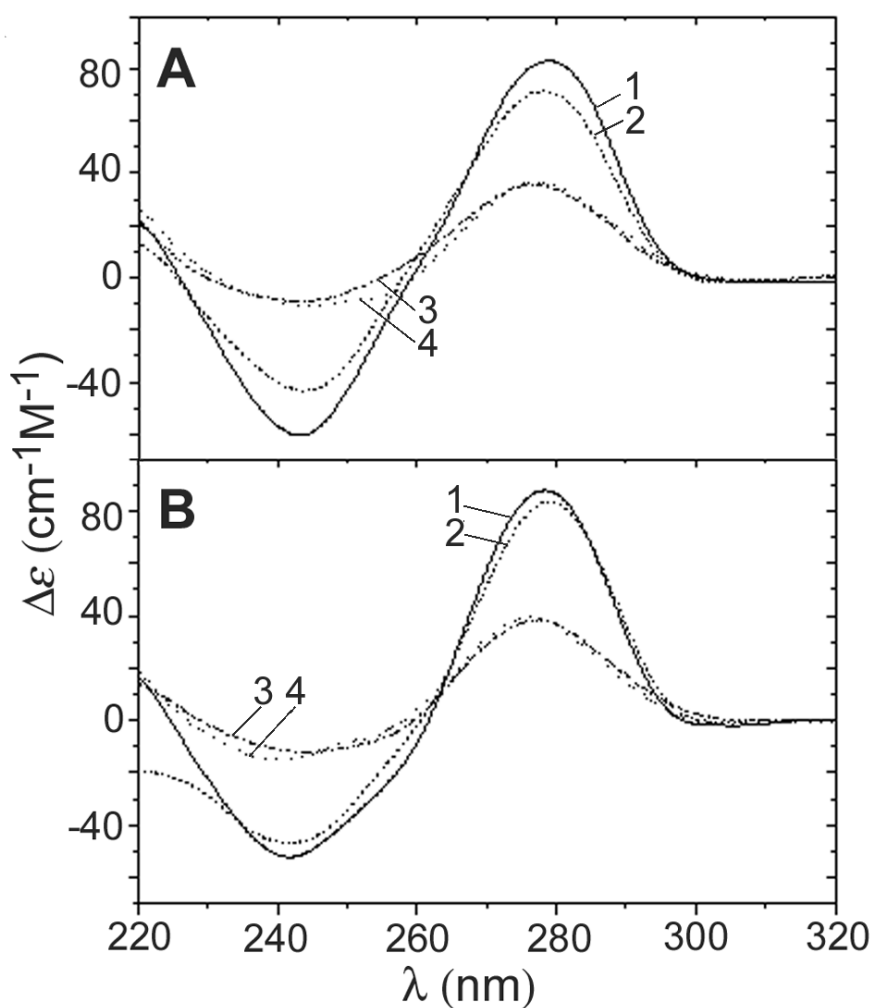

**FIGURE S2** CD spectra for the TGT (A) and AGT (B) duplexes unplatinated or containing a single, site-specific monofunctional adduct of  $[\text{PtCl}(\text{NH}_3)_3]\text{Cl}$  recorded at 25 or 90°C. The duplex concentration was 4  $\mu\text{M}$ , and the buffer conditions were 10 mM sodium phosphate (pH 7.0) and 150 mM NaCl. Curves: 1 and 3, unplatinated duplex at 25 and 90°C, respectively; 2 and 4, the monoadducted duplex at 25 and 90°C, respectively.  $\Delta\epsilon$  values are in units  $\text{cm}^{-1}\cdot\text{M}^{-1}$ , where M refers to mol of duplex per liter.
